# Supplementary material
Source: PubMed Central journal article supplement (PMC5266215)
Supplement: 11357_2016_9936_MOESM2_ESM.pdf [file 11357_2016_9936_MOESM2_ESM.pdf]

Table S2. Avid table

| Strain            | Fig. | Experiment | Temp. | n   | Add. Info. | % Avid |
|-------------------|------|------------|-------|-----|------------|--------|
| Wild-Type/Control | 1E   | 29         | 25°C  | 172 |            | 0.5    |
| <i>hif-1(ia4)</i> | 1E   | 29         | 25°C  | 208 |            | 7.7    |
| Wild-Type/Control | 1E   | 5          | 25°C  | 112 |            | 8.0    |
| <i>hif-1(ia4)</i> | 1E   | 5          | 25°C  | 101 |            | 2.0    |
| Wild-Type/Control | 1E   | 6          | 25°C  | 188 |            | 1.1    |
| <i>hif-1(ia4)</i> | 1E   | 6          | 25°C  | 209 |            | 5.3    |
| Wild-Type/Control | 1E   | 4          | 25°C  | 151 |            | 1.3    |
| <i>hif-1(ia4)</i> | 1E   | 4          | 25°C  | 151 |            | 9.9    |
| Wild-Type/Control | 1E   | 2          | 25°C  | 161 |            | 4.3    |
| <i>hif-1(ia4)</i> | 1E   | 2          | 25°C  | 90  |            | 21.1   |
| Wild-Type/Control | 1E   | 3          | 25°C  | 205 |            | 1.0    |
| <i>hif-1(ia4)</i> | 1E   | 3          | 25°C  | 195 |            | 10.2   |
| Wild-Type/Control | 1E   | 1          | 25°C  | 137 |            | 8.8    |
| <i>hif-1(ia4)</i> | 1E   | 1          | 25°C  | 242 |            | 7.0    |
| Wild-Type/Control | 1E   | 30         | 25°C  | 89  |            | 0      |
| <i>hif-1(ia4)</i> | 1E   | 30         | 25°C  | 122 |            | 0      |
| Wild-Type/Control | 1E   | 31         | 25°C  | 45  |            | 0      |
| <i>hif-1(ia4)</i> | 1E   | 31         | 25°C  | 107 |            | 11.2   |
| Wild-Type/Control | 1E   | 32         | 20°C  | 186 |            | 28.0   |
| <i>hif-1(ia4)</i> | 1E   | 32         | 20°C  | 233 |            | 66.5   |
| Wild-Type/Control | 1E   | 7          | 20°C  | 141 |            | 39.7   |
| <i>hif-1(ia4)</i> | 1E   | 7          | 20°C  | 101 |            | 56.4   |
| Wild-Type/Control | 1E   | 17         | 20°C  | 96  |            | 29.2   |
| <i>hif-1(ia4)</i> | 1E   | 17         | 20°C  | 140 |            | 47.1   |
| Wild-Type/Control | 1E   | 18         | 20°C  | 197 |            | 30.4   |
| <i>hif-1(ia4)</i> | 1E   | 18         | 20°C  | 101 |            | 50.5   |
| Wild-Type/Control | 1E   | 15         | 20°C  | 202 |            | 5.0    |
| <i>hif-1(ia4)</i> | 1E   | 15         | 20°C  | 192 |            | 27.6   |
| Wild-Type/Control | 1E   | 16         | 20°C  | 201 |            | 6.0    |
| <i>hif-1(ia4)</i> | 1E   | 16         | 20°C  | 124 |            | 29.8   |
| Wild-Type/Control | 1E   | 33         | 20°C  | 70  |            | 25.7   |
| <i>hif-1(ia4)</i> | 1E   | 33         | 20°C  | 92  |            | 42.4   |
| Wild-Type/Control | 1E   | 34         | 20°C  | 120 |            | 26.7   |
| <i>hif-1(ia4)</i> | 1E   | 34         | 20°C  | 104 |            | 74.0   |
| Wild-Type/Control | 1E   | 27         | 20°C  | 121 |            | 2.5    |
| <i>hif-1(ia4)</i> | 1E   | 27         | 20°C  | 132 |            | 38.6   |
| Wild-Type/Control | 1E   | 19         | 20°C  | 106 |            | 17.9   |
| <i>hif-1(ia4)</i> | 1E   | 19         | 20°C  | 139 |            | 46.0   |
| Wild-Type/Control | 1E   | 12         | 20°C  | 68  |            | 16.2   |
| <i>hif-1(ia4)</i> | 1E   | 12         | 20°C  | 79  |            | 53.2   |
| Wild-Type/Control | 1E   | 13         | 20°C  | 41  |            | 14.6   |
| <i>hif-1(ia4)</i> | 1E   | 13         | 20°C  | 124 |            | 28.2   |
| Wild-Type/Control | 1E   | 14         | 20°C  | 211 |            | 23.7   |

|                   |    |    |      |     |  |      |
|-------------------|----|----|------|-----|--|------|
| <i>hif-1(ia4)</i> | 1E | 14 | 20°C | 208 |  | 72.6 |
| Wild-Type/Control | 1E | 35 | 20°C | 71  |  | 0    |
| <i>hif-1(ia4)</i> | 1E | 35 | 20°C | 107 |  | 37.4 |
| Wild-Type/Control | 1E | 36 | 20°C | 186 |  | 5.4  |
| <i>hif-1(ia4)</i> | 1E | 36 | 20°C | 96  |  | 13.5 |
| Wild-Type/Control | 1E | 8  | 20°C | 122 |  | 42.6 |
| <i>hif-1(ia4)</i> | 1E | 8  | 20°C | 144 |  | 51.4 |
| Wild-Type/Control | 1E | 9  | 20°C | 172 |  | 60.0 |
| <i>hif-1(ia4)</i> | 1E | 9  | 20°C | 151 |  | 36.4 |
| Wild-Type/Control | 1E | 37 | 20°C | 103 |  | 11.7 |
| <i>hif-1(ia4)</i> | 1E | 37 | 20°C | 194 |  | 40.2 |
| Wild-Type/Control | 1E | 10 | 20°C | 142 |  | 8.5  |
| <i>hif-1(ia4)</i> | 1E | 10 | 20°C | 102 |  | 25.5 |
| Wild-Type/Control | 1E | 11 | 20°C | 168 |  | 63.1 |
| <i>hif-1(ia4)</i> | 1E | 11 | 20°C | 157 |  | 66.9 |
| Wild-Type/Control | 1E | 38 | 15°C | 101 |  | 30.7 |
| <i>hif-1(ia4)</i> | 1E | 38 | 15°C | 109 |  | 49.5 |
| Wild-Type/Control | 1E | 39 | 15°C | 82  |  | 39.0 |
| <i>hif-1(ia4)</i> | 1E | 39 | 15°C | 135 |  | 51.1 |
| Wild-Type/Control | 1E | 40 | 15°C | 144 |  | 73.6 |
| <i>hif-1(ia4)</i> | 1E | 40 | 15°C | 205 |  | 49.3 |
| Wild-Type/Control | 1E | 41 | 15°C | 149 |  | 77.2 |
| <i>hif-1(ia4)</i> | 1E | 41 | 15°C | 100 |  | 89.0 |
| Wild-Type/Control | 1E | 21 | 15°C | 163 |  | 23.3 |
| <i>hif-1(ia4)</i> | 1E | 21 | 15°C | 143 |  | 40.6 |
| Wild-Type/Control | 1E | 42 | 15°C | 233 |  | 73.3 |
| <i>hif-1(ia4)</i> | 1E | 42 | 15°C | 166 |  | 95.2 |
| Wild-Type/Control | 1E | 23 | 15°C | 135 |  | 85.1 |
| <i>hif-1(ia4)</i> | 1E | 23 | 15°C | 189 |  | 87.8 |
| Wild-Type/Control | 1E | 26 | 15°C | 64  |  | 26.6 |
| <i>hif-1(ia4)</i> | 1E | 26 | 15°C | 69  |  | 34.8 |
| Wild-Type/Control | 1E | 27 | 15°C | 121 |  | 41.3 |
| <i>hif-1(ia4)</i> | 1E | 27 | 15°C | 139 |  | 37.4 |
| Wild-Type/Control | 1E | 25 | 15°C | 123 |  | 4.9  |
| <i>hif-1(ia4)</i> | 1E | 25 | 15°C | 136 |  | 83.1 |
| Wild-Type/Control | 1E | 43 | 15°C | 71  |  | 1.4  |
| <i>hif-1(ia4)</i> | 1E | 43 | 15°C | 100 |  | 61.0 |
| Wild-Type/Control | 1E | 29 | 15°C | 87  |  | 89.7 |
| <i>hif-1(ia4)</i> | 1E | 29 | 15°C | 75  |  | 92.0 |
| Wild-Type/Control | 1E | 44 | 15°C | 74  |  | 50.0 |
| <i>hif-1(ia4)</i> | 1E | 44 | 15°C | 88  |  | 62.5 |
| Wild-Type/Control | 1E | 45 | 15°C | 89  |  | 75.3 |
| <i>hif-1(ia4)</i> | 1E | 45 | 15°C | 120 |  | 59.2 |
| Wild-Type/Control | 1E | 24 | 15°C | 104 |  | 7.7  |
| <i>hif-1(ia4)</i> | 1E | 24 | 15°C | 111 |  | 37.8 |
| Wild-Type/Control | 1E | 28 | 15°C | 206 |  | 93.2 |
| <i>hif-1(ia4)</i> | 1E | 28 | 15°C | 189 |  | 97.9 |

|                   |    |    |                  |     |  |      |
|-------------------|----|----|------------------|-----|--|------|
| Wild-Type/Control | 3A | 46 | 15°C             | 149 |  | 77.2 |
| <i>hif-1(ia4)</i> | 3B | 46 | 15°C             | 100 |  | 89   |
| Wild-Type/Control | 3A | 46 | 25°C             | 127 |  | 3.1  |
| <i>hif-1(ia4)</i> | 3B | 46 | 25°C             | 115 |  | 3.4  |
| Wild-Type/Control | 3A | 46 | 25°C-15°C day 2  | 133 |  | 90.2 |
| <i>hif-1(ia4)</i> | 3B | 46 | 25°C-15°C day 2  | 138 |  | 66.7 |
| Wild-Type/Control | 3A | 46 | 25°C-15°C day 4  | 139 |  | 66.9 |
| <i>hif-1(ia4)</i> | 3B | 46 | 25°C-15°C day 4  | 107 |  | 34.6 |
| Wild-Type/Control | 3A | 46 | 25°C-15°C day 6  | 126 |  | 33.3 |
| <i>hif-1(ia4)</i> | 3B | 46 | 25°C-15°C day 6  | 139 |  | 56.1 |
| Wild-Type/Control | 3A | 46 | 25°C-15°C day 8  | 137 |  | 21.9 |
| <i>hif-1(ia4)</i> | 3B | 46 | 25°C-15°C day 8  | 125 |  | 33.6 |
| Wild-Type/Control | 3A | 46 | 25°C-15°C day 10 | 131 |  | 9.2  |
| <i>hif-1(ia4)</i> | 3B | 46 | 25°C-15°C day 10 | 138 |  | 22.5 |
| Wild-Type/Control | 3C | 46 | 15°C-25°C day 2  | 91  |  | 12.1 |
| <i>hif-1(ia4)</i> | 3D | 46 | 15°C-25°C day 2  | 153 |  | 17.0 |
| Wild-Type/Control | 3C | 46 | 15°C-25°C day 4  | 141 |  | 5.7  |
| <i>hif-1(ia4)</i> | 3D | 46 | 15°C-25°C day 4  | 183 |  | 3.8  |
| Wild-Type/Control | 3C | 46 | 15°C-25°C day 7  | 123 |  | 21.1 |
| <i>hif-1(ia4)</i> | 3D | 46 | 15°C-25°C day 7  | 100 |  | 37.0 |
| Wild-Type/Control | 3C | 46 | 15°C-25°C day 10 | 132 |  | 29.5 |
| <i>hif-1(ia4)</i> | 3D | 46 | 15°C-25°C day 10 | 141 |  | 57.4 |
| Wild-Type/Control | 3A | 47 | 15°C             | 108 |  | 77.8 |
| <i>hif-1(ia4)</i> | 3B | 47 | 15°C             | 95  |  | 80   |
| Wild-Type/Control | 3A | 47 | 25°C             | 97  |  | 4.1  |
| <i>hif-1(ia4)</i> | 3B | 47 | 25°C             | 73  |  | 1.4  |
| Wild-Type/Control | 3A | 47 | 25°C-15°C day 2  | 55  |  | 27.2 |
| <i>hif-1(ia4)</i> | 3B | 47 | 25°C-15°C day 2  | 40  |  | 60   |
| Wild-Type/Control | 3A | 47 | 25°C-15°C day 4  | 37  |  | 5.4  |
| <i>hif-1(ia4)</i> | 3B | 47 | 25°C-15°C day 4  | 37  |  | 45.9 |
| Wild-Type/Control | 3A | 47 | 25°C-15°C day 6  | 60  |  | 1.7  |
| <i>hif-1(ia4)</i> | 3B | 47 | 25°C-15°C day 6  | 47  |  | 17.0 |
| Wild-Type/Control | 3A | 47 | 25°C-15°C day 8  | 67  |  | 0    |
| <i>hif-1(ia4)</i> | 3B | 47 | 25°C-15°C day 8  | 41  |  | 2.4  |
| Wild-Type/Control | 3A | 47 | 25°C-15°C day 10 | 66  |  | 0    |
| <i>hif-1(ia4)</i> | 3B | 47 | 25°C-15°C day 10 | 37  |  | 10.8 |
| Wild-Type/Control | 3C | 47 | 15°C-25°C day 2  | 94  |  | 3.2  |
| <i>hif-1(ia4)</i> | 3D | 47 | 15°C-25°C day 2  | 137 |  | 0.7  |
| Wild-Type/Control | 3C | 47 | 15°C-25°C day 4  | 96  |  | 2.1  |
| <i>hif-1(ia4)</i> | 3D | 47 | 15°C-25°C day 4  | 140 |  | 27.1 |
| Wild-Type/Control | 3C | 47 | 15°C-25°C day 7  | 91  |  | 15.4 |
| <i>hif-1(ia4)</i> | 3D | 47 | 15°C-25°C day 7  | 178 |  | 41.0 |
| Wild-Type/Control | 3C | 47 | 15°C-25°C day 10 | 88  |  | 52.3 |
| <i>hif-1(ia4)</i> | 3D | 47 | 15°C-25°C day 10 | 149 |  | 79.2 |
| Wild-Type/Control | 3A | 48 | 15°C             | 122 |  | 79.5 |
| <i>hif-1(ia4)</i> | 3B | 48 | 15°C             | 154 |  | 79.2 |

|                       |               |    |                  |     |    |      |
|-----------------------|---------------|----|------------------|-----|----|------|
| Wild-Type/Control     | 3A            | 48 | 25°C             | 136 |    | 2.9  |
| <i>hif-1(ia4)</i>     | 3B            | 48 | 25°C             | 197 |    | 11.7 |
| Wild-Type/Control     | 3A            | 48 | 25°C-15°C day 2  | 111 |    | 80.2 |
| <i>hif-1(ia4)</i>     | 3B            | 48 | 25°C-15°C day 2  | 189 |    | 86.7 |
| Wild-Type/Control     | 3A            | 48 | 25°C-15°C day 6  | 76  |    | 36.8 |
| <i>hif-1(ia4)</i>     | 3B            | 48 | 25°C-15°C day 6  | 98  |    | 50.0 |
| Wild-Type/Control     | 3C            | 48 | 15°C-25°C day 4  | 171 |    | 0    |
| <i>hif-1(ia4)</i>     | 3D            | 48 | 15°C-25°C day 4  | 289 |    | 9.7  |
| Wild-Type/Control     | 3C            | 48 | 15°C-25°C day 10 | 240 |    | 25.4 |
| <i>hif-1(ia4)</i>     | 3D            | 48 | 15°C-25°C day 10 | 228 |    | 49.6 |
|                       |               |    |                  |     |    |      |
| Wild-Type/Control     | 4A-D,<br>6B   | 49 | 25°C             | 238 |    | 0    |
| Wild-Type/Control     | 6B            | 49 | 25°C             | 74  | DR | 0    |
| <i>glp-4(bn2)</i>     | 4A, 4D        | 49 | 25°C             | 265 |    | 20.8 |
| <i>fem-3(q20)</i>     | 4B, 4D        | 49 | 25°C             | 289 |    | 26   |
| <i>fem-3(q20)</i>     | 6B            | 49 | 25°C             | 53  | DR | 0    |
| <i>glp-1(ar202gf)</i> | 4B, 4D        | 49 | 25°C             | 168 |    | 50   |
| <i>fem-3(e2006)</i>   | 4C, 4D,<br>6B | 49 | 25°C             | 222 |    | 0    |
| <i>fem-3(e2006)</i>   | 6B            | 49 | 25°C             | 53  | DR | 0    |
| <i>glp-1(e2141)</i>   | 4D, 6B        | 49 | 25°C             | 189 |    | 2.6  |
| <i>glp-1(e2141)</i>   | 6B            | 49 | 25°C             | 46  | DR | 0    |
| Wild-Type/Control     | 4D            | 50 | 25°C             | 147 |    | 0    |
| <i>glp-4(bn2)</i>     | 4D            | 50 | 25°C             | 163 |    | 19.5 |
|                       |               |    |                  |     |    |      |
| Wild-Type/Control     | 4D, 6B        | 51 | 25°C             | 72  |    | 1.4  |
| Wild-Type/Control     | 6B            | 51 | 25°C             | 104 | DR | 0    |
| <i>glp-4(bn2)</i>     | 4D            | 51 | 25°C             | 163 |    | 46   |
| <i>glp-1(ar202gf)</i> | 4D            | 51 | 25°C             | 230 |    | 58.3 |
| <i>glp-1(e2141)</i>   | 4D            | 51 | 25°C             | 221 |    | 57.9 |
| <i>glp-1(e2141)</i>   | 6B            | 51 | 25°C             | 117 | DR | 0    |
| <i>fem-3(q20)</i>     | 4D            | 51 | 25°C             | 175 |    | 56   |
| <i>fem-3(q20)</i>     | 6B            | 51 | 25°C             | 85  | DR | 0    |
| <i>fem-3(e2006)</i>   | 4D            | 51 | 25°C             | 125 |    | 0    |
| <i>fem-3(e2006)</i>   | 6B            | 51 | 25°C             | 78  | DR | 0    |
|                       |               |    |                  |     |    |      |
| Wild-Type/Control     | 5M            | 52 | 15°C             | 120 |    | 42.5 |
| <i>skn-1(zu135)</i>   | 5M            | 52 | 15°C             | 138 |    | 95.7 |
| Wild-Type/Control     | 5M            | 53 | 15°C             | 159 |    | 78.6 |
| <i>skn-1(zu135)</i>   | 5M            | 53 | 15°C             | 170 |    | 94.1 |
| Wild-Type/Control     | 5M            | 54 | 15°C             | 151 |    | 66.2 |
| <i>skn-1(zu135)</i>   | 5M            | 54 | 15°C             | 173 |    | 95.4 |
| Wild-Type/Control     | 5M            | 55 | 15°C             | 104 |    | 7.7  |
| <i>skn-1(zu135)</i>   | 5M            | 55 | 15°C             | 153 |    | 59.5 |
|                       |               |    |                  |     |    |      |

|                   |    |    |      |     |              |      |
|-------------------|----|----|------|-----|--------------|------|
| Wild-Type/Control | 6A | 25 | 15°C | 123 | fed          | 4.9  |
| <i>hif-1(ia4)</i> | 6A | 25 | 15°C | 136 | fed          | 83.1 |
| Wild-Type/Control | 6A | 25 | 15°C | 190 | DR           | 0    |
| <i>hif-1(ia4)</i> | 6A | 25 | 15°C | 128 | DR           | 0    |
| Wild-Type/Control | 6A | 24 | 15°C | 104 | fed          | 7.7  |
| <i>hif-1(ia4)</i> | 6A | 24 | 15°C | 111 | fed          | 37.8 |
| Wild-Type/Control | 6A | 24 | 15°C | 113 | DR           | 0    |
| <i>hif-1(ia4)</i> | 6A | 24 | 15°C | 59  | DR           | 0    |
| Wild-Type/Control | 6A | 7  | 15°C | 141 | fed          | 39.7 |
| <i>hif-1(ia4)</i> | 6A | 7  | 15°C | 101 | fed          | 56.4 |
| Wild-Type/Control | 6A | 7  | 15°C | 81  | DR           | 0    |
| <i>hif-1(ia4)</i> | 6A | 7  | 15°C | 87  | DR           | 0    |
| Wild-Type/Control | 6A | 11 | 15°C | 168 | fed          | 63.1 |
| <i>hif-1(ia4)</i> | 6A | 11 | 15°C | 157 | fed          | 66.9 |
| Wild-Type/Control | 6A | 11 | 15°C | 123 | DR           | 7.3  |
| <i>hif-1(ia4)</i> | 6A | 11 | 15°C | 80  | DR           | 7.5  |
| Wild-Type/Control | 6A | 57 | 15°C | 148 | fed          | 94.6 |
| <i>hif-1(ia4)</i> | 6A | 57 | 15°C | 122 | fed          | 80.3 |
| Wild-Type/Control | 6A | 57 | 15°C | 220 | DR           | 0    |
| <i>hif-1(ia4)</i> | 6A | 57 | 15°C | 124 | DR           | 0    |
|                   |    |    |      |     |              |      |
| Wild-Type/Control | 6C | 58 | 15°C | 95  | fed lifetime | 82.1 |
| <i>hif-1(ia4)</i> | 6D | 58 | 15°C | 130 | fed lifetime | 77.7 |
| Wild-Type/Control | 6C | 58 | 15°C | 182 | DR day 2     | 18.1 |
| <i>hif-1(ia4)</i> | 6D | 58 | 15°C | 94  | DR day 2     | 18.1 |
| Wild-Type/Control | 6C | 58 | 15°C | 141 | DR day 4     | 5.7  |
| <i>hif-1(ia4)</i> | 6D | 58 | 15°C | 132 | DR day 4     | 4.5  |
| Wild-Type/Control | 6C | 58 | 15°C | 123 | DR day 7     | 21.1 |
| <i>hif-1(ia4)</i> | 6D | 58 | 15°C | 119 | DR day 7     | 54.6 |
| Wild-Type/Control | 6C | 58 | 15°C | 132 | DR day 10    | 29.5 |
| <i>hif-1(ia4)</i> | 6D | 58 | 15°C | 112 | DR day 10    | 58.9 |
| Wild-Type/Control | 6C | 58 | 15°C | 120 | DR day 13    | 40.0 |
| <i>hif-1(ia4)</i> | 6D | 58 | 15°C | 154 | DR day 13    | 66.9 |
| Wild-Type/Control | 6C | 58 | 15°C | 123 | DR day 16    | 53.6 |
| <i>hif-1(ia4)</i> | 6D | 58 | 15°C | 133 | DR day 16    | 65.4 |
| Wild-Type/Control | 6C | 59 | 15°C | 155 | fed lifetime | 72.3 |
| <i>hif-1(ia4)</i> | 6D | 59 | 15°C | 143 | fed lifetime | 49.0 |

|                            |    |    |      |     |           |      |
|----------------------------|----|----|------|-----|-----------|------|
| Wild-Type/Control          | 6C | 59 | 15°C | 182 | DR day 2  | 6.0  |
| <i>hif-1(ia4)</i>          | 6D | 59 | 15°C | 132 | DR day 2  | 15.9 |
| Wild-Type/Control          | 6C | 59 | 15°C | 135 | DR day 4  | 0.7  |
| <i>hif-1(ia4)</i>          | 6D | 59 | 15°C | 161 | DR day 4  | 3.1  |
| Wild-Type/Control          | 6C | 59 | 15°C | 147 | DR day 7  | 4.1  |
| <i>hif-1(ia4)</i>          | 6D | 59 | 15°C | 131 | DR day 7  | 26.7 |
| Wild-Type/Control          | 6C | 59 | 15°C | 114 | DR day 10 | 5.3  |
| <i>hif-1(ia4)</i>          | 6D | 59 | 15°C | 194 | DR day 10 | 31.4 |
| Wild-Type/Control          | 6C | 59 | 15°C | 94  | DR day 13 | 2.1  |
| <i>hif-1(ia4)</i>          | 6D | 59 | 15°C | 100 | DR day 13 | 33.0 |
| Wild-Type/Control          | 6C | 59 | 15°C | 114 | DR day 16 | 26.3 |
| <i>hif-1(ia4)</i>          | 6D | 59 | 15°C | 155 | DR day 16 | 32.9 |
|                            |    |    |      |     |           |      |
| Wild-Type/Control          | 6F | 60 | 15°C | 123 |           | 74.8 |
| <i>daf-2</i>               | 6F | 60 | 15°C | 130 |           | 27.7 |
| Wild-Type/Control          | 6F | 61 | 15°C | 144 |           | 79.2 |
| <i>daf-2</i>               | 6F | 61 | 15°C | 103 |           | 37.9 |
| Wild-Type/Control          | 6F | 62 | 15°C | 131 |           | 75.6 |
| <i>daf-2</i>               | 6F | 62 | 15°C | 134 |           | 35.8 |
| Wild-Type/Control          | 6F | 63 | 15°C | 53  |           | 28.3 |
| <i>daf-2</i>               | 6F | 63 | 15°C | 58  |           | 5.2  |
|                            |    |    |      |     |           |      |
| Wild-Type/Control          | 6F | 64 | 20°C | 126 |           | 38.9 |
| <i>daf-2</i>               | 6F | 64 | 20°C | 126 |           | 0.8  |
| Wild-Type/Control          | 6F | 65 | 20°C | 73  |           | 13.7 |
| <i>daf-2</i>               | 6F | 65 | 20°C | 149 |           | 0    |
| Wild-Type/Control          | 6F | 66 | 20°C | 84  |           | 21.4 |
| <i>daf-2</i>               | 6F | 66 | 20°C | 86  |           | 4.7  |
| Wild-Type/Control          | 6F | 67 | 20°C | 63  |           | 7.9  |
| <i>daf-2</i>               | 6F | 67 | 20°C | 24  |           | 4.2  |
| Wild-Type/Control          | 6F | 68 | 20°C | 56  |           | 5.4  |
| <i>daf-2</i>               | 6F | 68 | 20°C | 64  |           | 0    |
|                            |    |    |      |     |           |      |
| Wild-Type/Control<br>+FUdR | S2 | 69 | 15°C | 114 |           | 71.9 |
| Wild-Type/Control<br>-FUdR | S2 | 69 | 15°C | 89  |           | 75.3 |
| Wild-Type/Control<br>+FUdR | S2 | 70 | 15°C | 118 |           | 66.1 |
| Wild-Type/Control          | S2 | 70 | 15°C | 112 |           | 50.0 |

|                            |    |    |      |     |  |      |
|----------------------------|----|----|------|-----|--|------|
| -FUdR                      |    |    |      |     |  |      |
| Wild-Type/Control<br>+FUdR | S2 | 71 | 15°C | 94  |  | 34.0 |
| Wild-Type/Control<br>-FUdR | S2 | 71 | 15°C | 105 |  | 77.1 |
| Wild-Type/Control<br>+FUdR | S2 | 72 | 15°C | 114 |  | 41.2 |
| Wild-Type/Control<br>-FUdR | S2 | 72 | 15°C | 134 |  | 38.8 |
| Wild-Type/Control<br>+FUdR | S2 | 73 | 15°C | 125 |  | 28.8 |
| Wild-Type/Control<br>-FUdR | S2 | 73 | 15°C | 119 |  | 54.6 |
| Wild-Type/Control<br>+FUdR | S2 | 74 | 20°C | 129 |  | 28.7 |
| Wild-Type/Control<br>-FUdR | S2 | 74 | 20°C | 92  |  | 19.6 |
| Wild-Type/Control<br>+FUdR | S2 | 75 | 20°C | 126 |  | 20.6 |
| Wild-Type/Control<br>-FUdR | S2 | 75 | 20°C | 113 |  | 19.5 |
