# Supplementary material
Source: PubMed Central journal article supplement (PMC5266215)
Supplement: 11357_2016_9936_MOESM3_ESM.pdf [file 11357_2016_9936_MOESM3_ESM.pdf]

Table S3. Lifespan table.

| Strain            | Fig.       | Experiment | Temp. | n   | mean | mean Avid only | mean censored (no Avid) | % Avid |
|-------------------|------------|------------|-------|-----|------|----------------|-------------------------|--------|
| <i>hif-1(ia4)</i> | 2C, 2E     | 4          | 25°C  | 151 | 17.0 | 17.0           | 17.0                    | 1.3    |
| <i>hif-1(ia4)</i> | 2C, 2E     | 4          | 25°C  | 151 | 21.1 | 15.1           | 21.8                    | 9.9    |
| Wild-Type/Control | 2C, 2E     | 5          | 25°C  | 112 | 21.1 | 14.7           | 21.7                    | 8.0    |
| <i>hif-1(ia4)</i> | 2C, 2E     | 5          | 25°C  | 101 | 23.5 | 18.0           | 23.6                    | 2.0    |
| Wild-Type/Control | 2C, 2E     | 1          | 25°C  | 137 | 19.2 | 18.3           | 19.3                    | 8.7    |
| <i>hif-1(ia4)</i> | 2C, 2E     | 1          | 25°C  | 242 | 22.5 | 18.2           | 22.9                    | 7.0    |
| Wild-Type/Control | 2C, 2E     | 6          | 25°C  | 188 | 21.6 | 11.5           | 21.7                    | 1.1    |
| <i>hif-1(ia4)</i> | 2C, 2E     | 6          | 25°C  | 209 | 22.6 | 16.0           | 23.0                    | 5.3    |
| Wild-Type/Control | 2C, 2E     | 2          | 25°C  | 161 | 21.0 | 17.9           | 21.1                    | 4.3    |
| <i>hif-1(ia4)</i> | 2C, 2E     | 2          | 25°C  | 90  | 21.4 | 19.5           | 21.9                    | 21.1   |
| Wild-Type/Control | 2C, 2E     | 3          | 25°C  | 205 | 16.5 | 14.0           | 16.5                    | 1.0    |
| <i>hif-1(ia4)</i> | 2C, 2E     | 3          | 25°C  | 195 | 20.1 | 16.4           | 20.6                    | 10.3   |
|                   |            |            |       |     |      |                |                         |        |
| Wild-Type/Control | 2B, 2F     | 14         | 20°C  | 211 | 24.1 | 19.8           | 25.5                    | 23.7   |
| <i>hif-1(ia4)</i> | 2B, 2F     | 14         | 20°C  | 208 | 23.0 | 19.3           | 29.0                    | 72.6   |
| Wild-Type/Control | 2B, 2F     | 12         | 20°C  | 68  | 23.7 | 20.7           | 24.3                    | 16.2   |
| <i>hif-1(ia4)</i> | 2B, 2F     | 12         | 20°C  | 79  | 21.6 | 20.5           | 23.0                    | 53.1   |
| Wild-Type/Control | 2B, 2F     | 13         | 20°C  | 41  | 28.7 | 21.0           | 30.0                    | 14.6   |
| <i>hif-1(ia4)</i> | 2B, 2F     | 13         | 20°C  | 124 | 27.3 | 19.9           | 30.2                    | 28.2   |
| Wild-Type/Control | 2B, 2F     | 15         | 20°C  | 202 | 19.6 | 16.5           | 19.8                    | 5.0    |
| <i>hif-1(ia4)</i> | 2B, 2F     | 15         | 20°C  | 192 | 19.7 | 16.2           | 21.0                    | 27.6   |
| Wild-Type/Control | 2B, 2F     | 19         | 20°C  | 106 | 26.5 | 23.8           | 27.1                    | 17.9   |
| <i>hif-1(ia4)</i> | 2B, 2F     | 19         | 20°C  | 139 | 26.7 | 22.3           | 30.5                    | 46.0   |
| Wild-Type/Control | 2B, 2F     | 16         | 20°C  | 201 | 19.3 | 15.2           | 19.6                    | 6.0    |
| <i>hif-1(ia4)</i> | 2B, 2F     | 16         | 20°C  | 124 | 19.8 | 15.6           | 21.5                    | 29.8   |
| Wild-Type/Control | 2B, 2D, 2F | 17         | 20°C  | 96  | 25.2 | 20.7           | 27.1                    | 29.2   |
| <i>hif-1(ia4)</i> | 2B, 2D, 2F | 17         | 20°C  | 140 | 25.0 | 22.0           | 27.8                    | 47.1   |
| Wild-Type/Control | 2B, 2D, 2F | 9          | 20°C  | 172 | 21.7 | 18.6           | 26.2                    | 59.9   |
| <i>hif-1(ia4)</i> | 2B, 2D, 2F | 9          | 20°C  | 151 | 29.1 | 20.7           | 33.9                    | 36.4   |
| Wild-Type/Control | 2B, 2D, 2F | 7          | 20°C  | 141 | 31.6 | 27.3           | 34.5                    | 39.7   |
| <i>hif-1(ia4)</i> | 2B, 2D, 2F | 7          | 20°C  | 101 | 31.4 | 26.9           | 37.2                    | 56.4   |
|                   |            |            |       |     |      |                |                         |        |
| Wild-Type/Control | 2A, 2G     | 26         | 15°C  | 64  | 34.2 | 27.2           | 36.7                    | 26.6   |
| <i>hif-1(ia4)</i> | 2A, 2G     | 26         | 15°C  | 69  | 29.8 | 25.3           | 32.3                    | 34.8   |
| Wild-Type/Control | 2A, 2G     | 27         | 15°C  | 121 | 31.3 | 24.4           | 36.2                    | 41.3   |
| <i>hif-1(ia4)</i> | 2A, 2G     | 27         | 15°C  | 139 | 32.8 | 26.9           | 36.4                    | 37.4   |
| Wild-Type/Control | 2A, 2G     | 28         | 15°C  | 206 | 27.7 | 27.6           | 28.6                    | 93.2   |
| <i>hif-1(ia4)</i> | 2A, 2G     | 28         | 15°C  | 189 | 26.6 | 26.6           | 26.0                    | 97.9   |
| Wild-Type/Control | 2A, 2G     | 24         | 15°C  | 104 | 40.7 | 42.9           | 40.5                    | 7.7    |
| <i>hif-1(ia4)</i> | 2A, 2G     | 24         | 15°C  | 111 | 35.6 | 30.1           | 38.9                    | 37.8   |
| Wild-Type/Control | 2A, 2G     | 25         | 15°C  | 123 | 37.7 | 26.8           | 38.2                    | 4.9    |
| <i>hif-1(ia4)</i> | 2A, 2G     | 25         | 15°C  | 136 | 34.0 | 31.1           | 48.3                    | 83.1   |

|                       |        |    |      |     |      |      |      |      |
|-----------------------|--------|----|------|-----|------|------|------|------|
| Wild-Type/Control     | 2A, 2G | 21 | 15°C | 163 | 32.1 | 25.4 | 34.1 | 23.3 |
| <i>hif-1(ia4)</i>     | 2A, 2G | 21 | 15°C | 143 | 33.1 | 26.4 | 37.7 | 40.6 |
| Wild-Type/Control     | 2A, 2G | 42 | 15°C | 233 | 29.4 | 32.7 | 27.8 | 73.4 |
| <i>hif-1(ia4)</i>     | 2A, 2G | 42 | 15°C | 166 | 28.8 | 29.9 | 28.5 | 95.2 |
| Wild-Type/Control     | 2A, 2G | 23 | 15°C | 135 | 32.2 | 30.4 | 29.4 | 85.2 |
| <i>hif-1(ia4)</i>     | 2A, 2G | 23 | 15°C | 189 | 29.7 | 28.8 | 28.8 | 87.8 |
|                       |        |    |      |     |      |      |      |      |
| Wild-Type/Control fed | 6E     | 25 | 15°C | 123 | 37.7 | 26.8 | 38.2 | 4.9  |
| <i>hif-1(ia4)</i> fed | 6E     | 25 | 15°C | 136 | 34.0 | 31.1 | 48.3 | 83.1 |
| Wild-Type/Control BD  | 6E     | 25 | 15°C | 190 | 38.3 | N/A  | 38.3 | 0.0  |
| <i>hif-1(ia4)</i> BD  | 6E     | 25 | 15°C | 128 | 62.7 | N/A  | 62.7 | 0.0  |
| Wild-Type/Control fed | 6E     | 57 | 15°C | 148 | 34.0 | 33.5 | 43.3 | 94.6 |
| <i>hif-1(ia4)</i> fed | 6E     | 57 | 15°C | 122 | 35.2 | 31.7 | 49.3 | 0.0  |
| Wild-Type/Control BD  | 6E     | 57 | 15°C | 220 | 44.0 | N/A  | 44.0 | 80.3 |
| <i>hif-1(ia4)</i> BD  | 6E     | 57 | 15°C | 124 | 63.0 | N/A  | 63.0 | 0.0  |
