# Supplementary material
Source: PubMed Central journal article supplement (PMC5266215)
Supplement: 11357_2016_9936_MOESM4_ESM.pdf [file 11357_2016_9936_MOESM4_ESM.pdf]

Table S4. List of strains.

| Strain name             | Genotype                                    | Outcrossed | Source    |
|-------------------------|---------------------------------------------|------------|-----------|
| N2 wild-type<br>Control | wild-type Bristol isolate                   | N/A        | J. Thomas |
| ZG31                    | <i>hif-1 (ia4)</i>                          | x9         | CGC       |
| SS104                   | <i>glp-4(bn2)</i>                           | x2         | CGC       |
| CF1903                  | <i>glp-1(e2141)</i>                         | x2         | CGC       |
| GC833                   | <i>glp-1(ar202gf)</i>                       | x1         | CGC       |
| EU31                    | <i>skn-1 (zu135)</i>                        | x2         | CGC       |
| JK816                   | <i>fem-3(q20)</i>                           | x1         | CGC       |
| CB3844                  | <i>fem-3(e2006)</i>                         | x1         | CGC       |
| AD238                   | <i>asls2[pie-1::mcherry::egg-3]</i>         | x3         | CGC       |
| RW10029                 | <i>his-72::GFP + pie-1::H2B::GFP::pie-1</i> | x1         | CGC       |
| PS4657                  | <i>ajm-1 (jam-1)::GFP</i>                   | x1         | CGC       |
| SJ4103                  | <i>myo-3::GFP</i>                           | x3         | CGC       |
| RT130                   | <i>pwls23 [vit-2::GFP]</i>                  | x2         | CGC       |
| RT368                   | <i>pwls98 [YP170::tdimer2 + unc-119(+)]</i> | x1         | CGC       |
| TP12                    | <i>col-19::GFP</i>                          | x4         | CGC       |
| NH2447                  | <i>egl-15::GFP</i>                          | x2         | CGC       |
| MH1317                  | <i>egl-13::GFP</i>                          | x2         | CGC       |
