# Supplementary material
Source: PubMed Central journal article supplement (PMC5266215)
Supplement: 11357_2016_9936_MOESM6_ESM.pdf [file 11357_2016_9936_MOESM6_ESM.pdf]

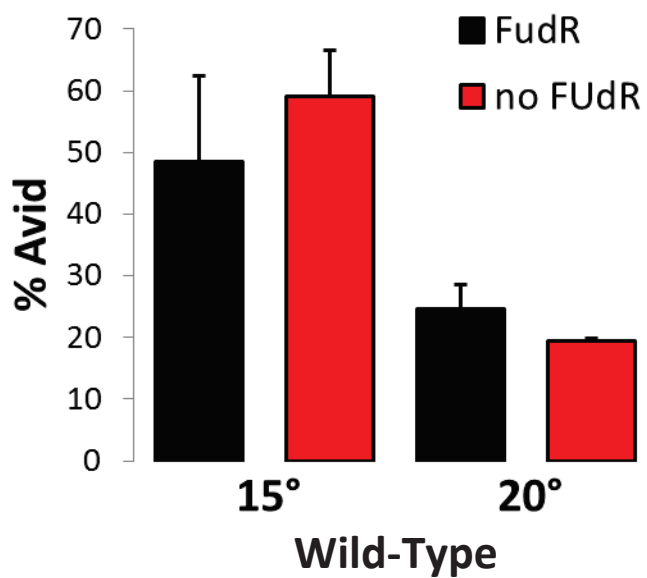

**Figure S2. FudR does not cause Avid.**

Quantification of total Avid levels of wild-type worms grown in the presence (black bars) and absence (red bars) of FudR.

Error bars represent the standard error of the mean.
