# Supplementary material
Source: PubMed Central journal article supplement (PMC5266215)

[Click here to view linked References](#)

1

## Supporting Information

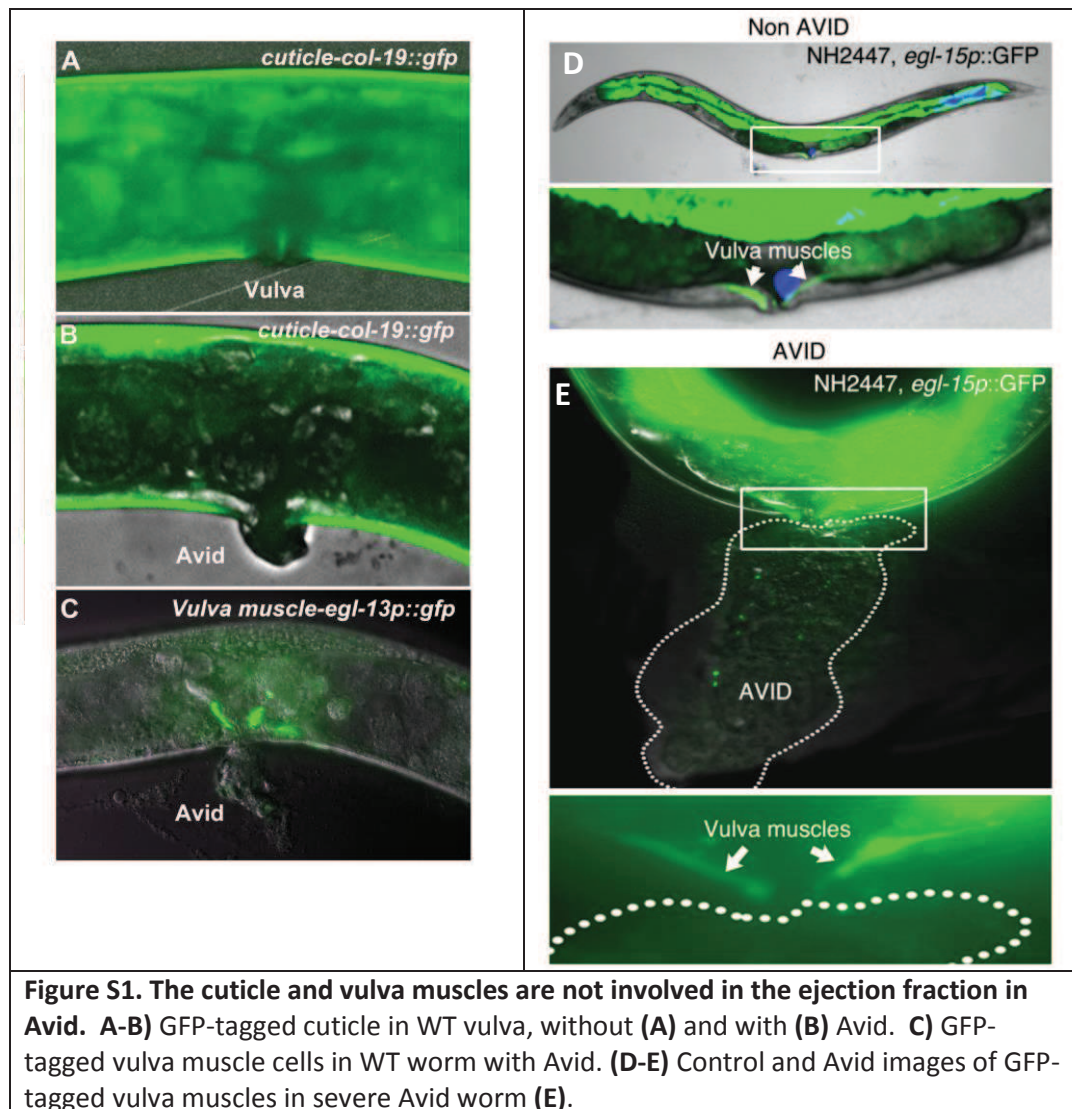

Supplement: 11357_2016_9936_MOESM5_ESM.pdf [file 11357_2016_9936_MOESM5_ESM.pdf]
